# Supplementary material for: The coordinate actions of calcineurin and Hog1 mediate the stress response through multiple nodes of the cell cycle network
Source: PLoS Genet. 2020 Apr 28;16(4):e1008600. doi: 10.1371/journal.pgen.1008600 (PMC7209309; doi:10.1371/journal.pgen.1008600)
Supplement: S2 Data — (XLSX) [file pgen.1008600.s013.xlsx]

## Sheet: information
RNA seq data from CaCl2 time course experiments in crz1 hog1 cells
Each sheet inlcudes log2 fold change values for groups of genes presented in Figure 5
Key
sheet name	figures	reference for gene list
all SBF MBF	5D	Ferrezuelo et al, Genome Biol 11, R67 (2010)
Fkh2_Ndd1	5H	Spellman et al, Mol Biol Cell 9, 3273–3297 (1998)

## Sheet: all SBF MBF
	hog1 ET-10	hog1 ET-30	hog1 ET-60	hog1 FK-10	hog1 FK-30	hog1 FK-60
YLR049C	0.00175727	-0.313503	0.157095	-0.0135836	-0.0341756	0.116998
MSA2	-0.362828	-0.300394	-0.458615	0.36794	-0.0112319	0.0451487
DUN1	0.247187	0.143488	0.215864	0.492944	0.422575	0.124188
SPH1	-0.171902	-0.0396108	-0.0327251	-0.00745687	0.127354	-0.00304494
CMR1	-0.401592	-0.474975	-0.530965	-0.0922282	-0.108675	-0.111897
SPC42	-0.0456573	-0.0705974	0.0469997	0.250662	0.444377	0.387535
SPC110	-0.0462822	0.018036	0.182122	0.213281	0.318334	0.273119
RLF2	-0.434262	-0.456249	-0.632333	-0.128585	-0.211533	-0.0767629
CLB5	-0.800617	-0.904029	-1.0582	-0.573696	-0.505894	-0.0516894
YPR174C	-0.339252	-0.795486	-0.482328	-0.418657	-0.495498	-0.0704753
STB1	-0.202594	-0.310705	-0.0983786	-0.0460239	-0.0765295	0.225927
ERV25	-0.109819	-0.221666	-0.21702	-0.13413	-0.0810691	0.152521
YJL181W	-0.612983	-0.732397	-0.7035	-0.145871	0.182636	0.312931
ELG1	-0.633202	-0.66582	-0.373603	-0.538951	-0.215476	0.139552
MIF2	0.108874	-0.0206519	-0.0881256	0.310226	-0.0320185	-0.0368668
SMC5	-0.379681	-0.251796	-0.133928	-0.147404	-0.138372	0.0848626
RAD5	0.234362	-0.0981979	-0.330181	0.323417	-0.261747	-0.269031
PMS1	-0.00828425	-0.0764418	-0.173253	0.0774483	-0.0472269	-0.0596126
ESC8	0.195739	0.0266147	-0.0877803	0.297741	0.191415	0.137811
SEN34	-0.61228	-0.651786	-0.974464	-0.360842	-0.520885	0.119006
SLK19	-0.245385	-0.439364	-0.254619	0.0901193	-0.0211719	0.16521
MRC1	-0.466981	-0.417086	-0.278097	-0.202717	-0.0853666	0.0281164
TOF1	-0.0596292	-0.196412	-0.154018	-0.065606	-0.147072	0.0303893
RAD53	-0.132224	-0.198433	-0.399138	0.0699099	-0.282515	-0.318925
ASF1	-0.503868	-0.710262	-0.709111	-0.0518895	-0.313454	0.0370319
CDC45	-0.772561	-1.05274	-0.779769	-0.548255	-0.233427	-0.100496
YML133C	0.0849033	-0.464565	0.0395352	-1.49079	-0.400495	-0.806825
PDS5	-0.095279	-0.456631	-0.282495	0.0501517	-0.03894	0.0823119
MSH2	0.0366639	0.154838	-0.0358831	0.0121434	0.0445584	0.00218017
RAD51	0.450669	0.337478	0.307333	0.463849	0.404413	0.248297
TUB4	0.370659	0.3393	0.0616481	0.335811	0.137247	0.313115
CTF4	0.234226	0.321409	0.228661	0.147505	0.223891	0.17723
MKC7	-1.14477	-1.44135	-1.41877	-1.10802	-0.779468	-0.195929
POL3	-0.172374	-0.370631	-0.350844	-0.131385	-0.203319	0.237509
RNH202	-0.453442	-0.828601	-0.543564	-0.291867	-0.349223	0.104264
YIF1	-0.181967	-0.206307	-0.284428	-0.0506903	-0.0222813	-0.0196723
RKM1	-0.134846	-0.39113	-0.276225	-0.122058	-0.02815	0.0319415
YDL157C	-0.324155	-0.788381	-1.02117	-0.194383	-0.532577	-0.191849
SMC3	-0.418259	-0.845025	-0.651663	-0.330982	-0.367762	0.0321348
MSH6	-0.248662	-0.680435	-0.517253	-0.152946	-0.379121	0.18232
CDC9	-0.254903	-0.445162	-0.568589	-0.15745	-0.0500895	0.111305
BNI4	-0.0943545	-0.109632	-0.204874	0.0387622	-0.021898	0.0328008
OGG1	-0.706437	-1.79489	-1.27396	-0.492695	-0.341913	0.447741
SPO16	-0.729184	-0.637969	-0.712998	0.0644719	-0.197349	0.116514
POL32	-0.182295	-0.119118	-0.321311	-0.469014	-0.237349	-0.261074
CDC21	0.287271	-0.0161481	-0.162771	0.150597	0.0568708	0.232362
DPB2	-0.745599	-1.09253	-1.00804	-0.405909	-0.426823	0.0384587
NSE4	-0.217196	-0.249616	-0.41034	0.0165366	-0.345582	-0.106355
SHO1	-0.756155	-0.66966	-0.425555	-0.645009	-0.201213	0.0687282
RFA1	0.183577	0.444152	0.263782	0.238854	0.421035	0.0632352
SMC1	-0.103361	-0.199637	-0.356008	-0.116742	-0.181806	-0.231399
SLD2	-0.24117	-0.232066	-0.214553	-0.00367908	-0.114141	-0.107162
PRI2	-0.056169	-0.174775	-0.227803	0.0705561	-0.0690508	-0.00591708
ZDS2	-0.0646296	-0.323609	0.0250784	0.389215	0.301993	0.426767
BIM1	0.174237	0.101954	0.0785907	-0.000990408	-0.0745499	-0.393368
IRR1	-0.212403	-0.0858937	-0.117626	0.00999792	-0.00486898	0.124779
GRX6	0.380031	0.683578	0.48035	0.52428	0.749766	-0.0421935
ASF2	0.398538	0.167933	-0.0613989	0.33889	-0.0783404	-0.133253
RFA2	0.248769	0.300339	0.497132	0.27023	0.342766	0.307878
ERP3	-0.0528987	0.35367	0.235313	0.261516	0.284515	0.158435
ERP5	-0.0161211	0.243227	0.404981	0.0352626	0.164411	0.177167
POL12	-0.620788	-0.475014	-0.284813	-0.487589	-0.0848542	0.17279
YOL019W	0.0863587	0.413305	0.760313	-0.164086	0.291014	0.628333
HO	-0.653909	-1.40549	-1.04468	-0.554353	-0.761166	-0.254044
CSI2	0.160587	0.856775	0.812877	-0.204114	0.401577	0.50853
SVS1	0.0543174	1.84763	2.56349	-0.354526	0.975574	1.15997
PCL2	0.929898	1.56736	2.20584	0.95665	1.35881	0.943325
CLN2	-0.473708	0.227308	0.230665	-0.687616	0.157584	0.389918
YPS3	0.217661	0.518146	0.586261	0.35308	0.446197	0.514288
PSA1	-0.206141	-0.947086	-0.896413	-0.163071	-0.258382	0.233756
TOS6	-0.441745	0.61512	1.52591	-0.236494	0.401458	1.02949
KCH1	0.0742479	0.236866	0.516833	-0.0100221	0.335761	0.304613
MSB2	-0.157618	0.507094	0.74111	-0.111754	0.541178	0.709354
PRY2	-0.027002	1.04526	1.85885	-0.225723	0.731744	1.43743
SVL3	-0.707547	-0.708646	-0.673554	-0.716729	-0.0991695	0.0439215
HTA2	-0.694317	-0.792294	-1.34856	-0.630902	-0.30794	-0.0127617
HTA1	-0.313367	-0.507619	-1.15605	-0.454781	-0.332284	0.0326444
GAS1	-0.482887	-1.01329	-0.72572	-0.436636	-0.593855	0.17791
SRL1	-0.175981	0.202621	0.528756	-0.136385	0.0494492	0.328981
PMI40	0.0638593	-0.126709	-0.266802	0.0885374	-0.0635479	0.27333
HHO1	-0.0172462	-0.0192742	0.380494	0.0558668	0.342277	0.476238
HTB2	-0.365824	-0.590579	-1.2075	-0.374425	-0.272478	0.0809178
SPC29	0.424737	0.615793	0.624588	0.432907	0.0735197	-0.0646714
BBP1	-0.31121	-0.320339	-0.250196	-0.100733	0.0742627	0.157014
SPC105	0.0918287	0.362328	0.245642	0.057116	0.224223	-0.165569
NRM1	-1.61424	-1.47676	-1.31445	-0.698325	-0.301727	-0.0329765
VRG4	-0.412247	-0.930323	-1.0166	-0.388054	-0.534541	0.0108536
HHF1	-0.427079	-0.643669	-1.08236	-0.345874	-0.268194	-0.0477505
HTB1	-0.513121	-0.619506	-0.981385	-0.529416	-0.276067	-0.040892
TOS4	-0.531915	-0.523529	-0.543516	-0.133647	-0.26107	0.224146
WSC2	0.475803	0.733626	0.933257	0.412599	0.512996	0.533694
STU2	-0.172448	-0.372016	-0.214358	0.122307	0.131871	0.0302078
NDD1	-0.131861	-0.203269	0.157044	0.0501333	0.151715	0.172192
HHT2	-0.450011	-0.273535	-0.768692	-0.495097	-0.185753	-0.134713
ALK2	-0.820386	-0.735284	-0.140116	-0.314241	0.142344	0.57953
YHR173C	-0.376225	-0.717521	-0.374562	-0.244638	0.0804003	0.114728
HTZ1	0.0599946	0.102697	0.240802	0.0819674	0.332291	0.354844
PGM1	0.0948722	0.239117	0.779304	0.171589	0.101965	0.395029
PXL1	-0.0105925	-0.3765	-0.48262	-0.00267364	-0.136611	-0.0365516
YBR071W	-0.665602	-0.815639	-0.380037	-0.517319	-0.193946	0.357646
CLN1	-0.0865389	0.135191	0.251353	-0.00696821	0.0690933	0.438463
EXG1	-1.57726	-0.818875	-0.013605	-1.35251	0.38205	0.950984
YOX1	0.0947159	0.202251	0.110947	0.0736111	0.213866	0.366444
CRH1	-0.487094	-0.31733	0.479014	-0.43693	-0.21504	0.355098
RNR1	-0.601874	-1.22804	-1.26431	-0.29297	-0.00192523	0.478564
AXL2	0.107178	1.06471	1.21933	0.09555	0.524449	0.551665
HSL1	-0.0572191	0.515713	0.536036	-0.151044	0.195315	0.298555
GIC2	0.775308	1.10759	1.68681	0.799115	0.996528	0.9759
SKG6	-1.65082	-1.75112	-0.96902	-1.03743	-0.165747	0.431694
SPT21	-0.712446	-0.580188	-0.781071	-0.411447	-0.292312	-0.212969
PDS1	0.0550116	-0.0502049	0.0175815	0.287602	0.284933	-0.125991
POL30	-0.581486	-0.920111	-0.913038	-0.384476	-0.13924	0.307767
GIN4	-0.501662	0.0218202	0.247626	-0.427237	0.113384	0.374232
MNN1	-1.41256	-1.22866	-1.05331	-1.2805	-0.412287	0.0543162
ACM1	-0.919531	-1.12027	-0.980271	-0.495492	-0.0353215	0.0793832
HHF2	-0.573241	-0.567788	-1.15643	-0.69857	-0.335974	-0.0548344
HCM1	0.261388	0.387693	0.351833	0.288698	0.167704	0.12078
MCD1	-0.515578	-0.622669	-0.535199	-0.196007	-0.0272858	0.116779
CBF2	-1.16189	-1.14269	-0.948349	-0.694523	-0.205539	0.195421
SWE1	-0.131399	0.149777	0.370769	-0.00657796	0.29357	0.448827
POL1	-0.44491	-0.894816	-0.925546	-0.331684	-0.430842	0.118543
SUR2	-0.335133	-1.07548	-0.811716	-0.141892	-0.487728	0.0982901
RAD27	-0.343199	-0.625378	-0.736194	-0.321721	-0.298569	-0.00622359
RTT107	-0.715172	-1.4821	-1.10248	-0.382921	-0.330056	0.0211027
YMR144W	-0.256084	-0.628292	-0.193008	0.0434942	0.189101	0.0699278
SCW10	-0.25315	0.2417	1.22922	-0.314619	0.417004	1.16704
SMC6	-0.353722	-0.412088	-0.44347	-0.141293	-0.0765589	0.0344111
PDR16	-0.189781	-0.49553	-0.727132	-0.167476	-0.603605	-0.656513
RSR1	-0.000897038	0.157189	0.322667	-0.139111	-0.185929	-0.20923
CLB6	-0.690971	-1.17101	-1.86505	-0.291569	-0.0429367	-0.0236238
RFA3	-0.283509	-0.283849	-0.15105	-0.0527622	-0.162389	-0.0559114
YOR114W	0.197921	0.578086	0.868973	0.532083	0.513844	0.324828
ALG14	-0.329749	-0.482342	-0.404139	0.117226	-0.426947	0.0929021
OCH1	0.333396	0.484882	0.43878	0.0473563	0.0274486	-0.13722

## Sheet: Fkh2_Ndd1
	hog1 ET-10	hog1 ET-30	hog1 ET-60	hog1 FK-10	hog1 FK-30	hog1 FK-60
YLR049C	0.00175727	-0.313503	0.157095	-0.0135836	-0.0341756	0.116998
MSA2	-0.362828	-0.300394	-0.458615	0.36794	-0.0112319	0.0451487
DUN1	0.247187	0.143488	0.215864	0.492944	0.422575	0.124188
SPH1	-0.171902	-0.0396108	-0.0327251	-0.00745687	0.127354	-0.00304494
CMR1	-0.401592	-0.474975	-0.530965	-0.0922282	-0.108675	-0.111897
SPC42	-0.0456573	-0.0705974	0.0469997	0.250662	0.444377	0.387535
SPC110	-0.0462822	0.018036	0.182122	0.213281	0.318334	0.273119
RLF2	-0.434262	-0.456249	-0.632333	-0.128585	-0.211533	-0.0767629
NUM1	-0.19029	0.116078	0.152795	-0.143409	0.129637	0.0568557
VAC17	-0.595795	-0.662663	-0.492616	-0.25716	-0.0118419	0.111227
APC1	-0.0240788	-0.157018	-0.036396	0.0444665	0.0457349	0.104435
BUD8	-0.232366	-0.265097	0.0560707	-0.0688899	-0.105182	0.0500396
BUD3	-0.427267	-0.624799	-0.280887	-0.401576	-0.0956963	0.0269183
FRK1	-0.735661	-0.581931	0.0514725	-0.153989	0.124286	0.110552
KIP2	-0.13251	-0.0518796	0.327952	0.107434	0.0832363	0.223964
IQG1	-0.219888	-0.244983	0.109094	-0.0681632	0.126052	-0.0337272
TPO3	-0.471697	-0.617677	-0.725647	-0.229478	-0.155008	-0.304038
BUD4	-0.513939	-0.711166	-0.55535	-0.19155	0.12577	-0.00256295
SHE2	-0.216763	-0.478139	-0.471147	0.0663734	0.0245759	0.0864625
TEM1	-0.274866	-0.552367	-0.726548	-0.249306	-0.127361	-0.294355
YNL058C	-0.446809	-0.796466	-0.614442	-0.17076	-0.204543	-0.397421
CHS2	0.089008	-0.113662	0.259357	0.342827	0.204242	0.267184
MYO1	-0.323035	-0.647271	-0.527347	-0.250428	-0.0603689	-0.153139
IRC8	-0.67257	-0.891534	-0.592112	-0.125349	-0.159143	-0.129131
AIM20	-1.24894	-1.23321	-0.874425	-0.791029	-0.287239	-0.184755
SRC1	0.274647	0.0564902	0.271451	0.627495	0.302996	-0.0284191
MOB1	0.285602	0.190873	0.377415	0.378245	0.178636	0.0509514
HST3	0.0175081	-0.301384	-0.138206	0.190013	-0.049868	-0.195802
ACE2	-0.186215	-0.158098	-0.0927843	0.205163	0.120786	-0.20745
CDC20	-0.696468	-0.709837	-0.0428024	-0.211996	-0.110383	-0.0328933
HOF1	0.622254	-0.627453	-0.708161	0.826338	-0.16865	-0.600893
YML119W	-0.360572	-0.576672	-0.290436	0.176596	-0.307454	-0.331341
MMR1	-0.144017	-0.280215	-0.149992	0.0304193	-0.13911	-0.150531
SWI5	-0.375896	-0.961364	-0.730996	0.0379753	-0.148572	-0.271937
ALK1	-0.887207	-0.958789	-0.430942	-0.341577	0.0880637	-0.157147
CLB2	-0.766871	-0.808528	-0.512445	-0.0673187	-0.00445318	-0.0702593
CDC5	-0.813431	-0.925321	-0.557525	-0.323374	-0.145278	-0.248842
CLB1	-1.10835	-1.23282	-0.791616	-0.239106	0.0323494	0.128613
