# Supplementary material for: The coordinate actions of calcineurin and Hog1 mediate the stress response through multiple nodes of the cell cycle network
Source: PLoS Genet. 2020 Apr 28;16(4):e1008600. doi: 10.1371/journal.pgen.1008600 (PMC7209309; doi:10.1371/journal.pgen.1008600)
Supplement: S3 Data — (XLSX) [file pgen.1008600.s014.xlsx]

## Sheet: FACS quantitation
Quantification of primary FACS data
*Each tab includes the values used to generate the graph of FACS data in the indicated Figure.
*Figures depict mean values +/- standard deviation for the replicates shown.
*For quantification of % S-phase, statistical signifcance was determined by comparing data at each time point to the corresponding t=0, using a paired t-test in GraphPad Prism.

## Sheet: Fig1B
Quantification of % S phase following 200mM CaCl2 addition
Replicate 1					Replicate 2					Replicate 3
minutes	ET	FK506	hcm1		minutes	ET	FK506	hcm1		minutes	ET	FK506
0	8.11	8.55	8.32		0	8.55	8.19	7.9		0	9.67	9.92
10	6.57	5.75	7.26		10	9.65	6.71	7.26		10	7.57	9.34
20	5.14	5.1	5.71		20	4.84	5.98	5.32		20	5.05	5.33
30	3.33	3.88	3.51		30	3.49	3.31	2.43		30	2.36	3.42
45	3.63	5.94	3.58		45	2.21	4.05	1.86		45	2.78	5.15
60	4.04	7.93	4.24		60	3.68	9.14	4.38		60	4.97	10.8
90	5.6	7.44	5.47		90	5.69	8.59	6.93		90	7.71	9.29

## Sheet: Fig 1C
Quantification of cell cycle progression following release from a G1 arrest into media with or without 200mM CaCl2
Replicate 1						Replicate 2						Replicate 3
minutes	CNB1	CNB1 + CaCl2	cnb1Δ	cnb1Δ + CaCl2		minutes	CNB1	CNB1 + CaCl2	cnb1Δ	cnb1Δ + CaCl2		minutes	CNB1	CNB1 + CaCl2	cnb1Δ	cnb1Δ + CaCl2
0	3.40909	4.54545	7.95455	8.52273		0	5.71429	4.2328	2.15054	2.10526		0	4.14201	3.74332	3.38983	3.88889
15	2.84091	3.40909	9.65909	7.95455		15	13.7143	5.82011	9.13978	5.78947		15	4.73373	5.88235	5.08475	6.66667
30	50.5682	5.68182	53.4091	10.7955		30	82.8571	6.34921	66.129	16.3158		30	55.6213	9.62567	47.4576	7.77778
40	84.6591	6.25	85.2273	25		40	100.571	11.6402	90.8602	43.6842		40	85.7988	10.6952	76.8362	32.2222
50	98.8636	13.0682	103.409	60.7955		50	101.143	24.8677	97.8495	75.2632		50	91.1243	22.9947	91.5254	68.8889
60	98.2955	25.5682	111.932	93.75		60	98.2857	42.328	97.3118	90.5263		60	95.858	44.9198	92.6554	81.6667
70	97.7273	45.4545	105.682	106.818		70	99.4286	58.2011	97.3118	97.3684		70	95.858	64.7059	95.4802	94.4444
80	96.5909	64.2045	109.091	109.659		80	88	67.1958	92.4731	95.7895		80	94.6746	75.4011	96.0452	95.5556
90	66.4773	81.25	78.4091	114.773		90	70.2857	84.6561	74.7312	95.7895		90	84.0237	80.7487	82.4859	92.2222

## Sheet: Fig 1D
Quantification of cell cycle progression following release from a G1 arrest into media with or without 200mM CaCl2
Replicate 1					Replicate 2					Replicate 3
minutes	ET	ET + CaCl2	FK506 + CaCl2		minutes	ET	ET + CaCl2	FK506 + CaCl2		minutes	ET	ET + CaCl2	FK506 + CaCl2
0	0	0	0		0	0	0	0		0	0	0	0
15	4.11765	2.76243	0		15	2.15827	-1.14286	4.26829		15	6.54762	4.46927	0
30	32.3529	3.31492	7.34463		30	33.0935	0.571429	9.14634		30	30.9524	-0.558659	4.40252
40	51.7647	6.62983	22.0339		40	69.0647	2.85714	22.561		40	49.4048	3.91061	21.3836
50	65.2941	14.9171	40.678		50	71.9424	11.4286	46.9512		50	63.0952	11.7318	42.7673
60	71.1765	20.9945	55.9322		60	80.5755	20	58.5366		60	70.8333	15.6425	56.6038
70	81.1765	31.4917	64.9718		70	84.1727	34.8571	73.7805		70	79.1667	21.7877	64.7799
80	75.8824	39.779	72.3164		80	79.1367	34.8571	80.4878		80	75	30.1676	70.4403
90	66.4706	46.9613	76.8362		90	70.5036	49.7143	76.8293		90	67.2619	36.8715	72.327

## Sheet: Fig 1E
Quantification of cell cycle progression following release from a S-phase arrest into media with or without 200mM CaCl2
Replicate 1					Replicate 2					Replicate 3
minutes	ET	ET + CaCl2	FK506 + CaCl2		minutes	ET	ET + CaCl2	FK506 + CaCl2		minutes	ET	ET + CaCl2	FK506 + CaCl2
0	0	0	0		0	0	0	0		0	0	0	0
15	8.90411	1.2987	7.14286		15	9.93377	4.48718	3.14465		15	16.3522	2.51572	6.71141
30	23.2877	5.84416	9.74026		30	23.8411	6.41026	8.80503		30	28.9308	9.43396	14.094
40	32.1918	9.74026	12.987		40	42.3841	14.1026	20.1258		40	41.5094	15.7233	23.4899
50	50.6849	20.1299	24.026		50	60.2649	26.2821	35.8491		50	60.3774	26.4151	33.557
60	70.5479	31.1688	35.0649		60	80.1325	39.1026	50.9434		60	73.5849	34.5912	46.3087
70	81.5068	50	49.3506		70	86.0927	54.4872	64.7799		70	82.3899	52.2013	59.7315
80	89.726	51.9481	58.4416		80	88.0795	60.2564	70.4403		80	88.0503	71.6981	73.1544
90	92.4658	57.1429	68.8312		90	91.3907	69.8718	76.7296		90	86.7925	61.0063	75.8389

## Sheet: Fig 1F
Quantification of cell cycle progression after synchronization in mitosis, with or without the addition of 200mM CaCl2
Replicate 1					Replicate 2					Replicate 3					Replicate 4
minutes	ET	ET + CaCl2	FK506 + CaCl2		minutes	ET	ET + CaCl2	FK506 + CaCl2		minutes	ET	ET + CaCl2	FK506 + CaCl2		minutes	ET	ET + CaCl2	FK506 + CaCl2
0	77.5572	78.0354	77.4492		0	85.1056	83.6025	83.9862		0	90.5269	90.8607	90.9733		0	84.7193	84.1423	85.294
15	82.0055	82.2972	81.1391		15	86.2119	86.2932	85.4828		15	91.6787	92.0294	91.8325		15	85.4481	87.0777	87.8729
30	74.379	82.417	74.0222		30	74.1896	84.8001	77.3885		30	76.2032	88.0695	78.256		30	76.7137	85.7557	78.3726
40	63.4092	77.0319	66.7483		40	62.4439	79.6056	66.2682		40	67.3709	83.6513	68.542		40	64.885	82.195	63.9203
50	53.9321	73.1978	58.2243		50	51.22	72.2009	54.7961		50	56.9198	76.5668	58.3103		50	52.2074	77.2504	54.7331
60	42.6032	63.9246	48.0097		60	45.2632	65.9364	46.6574		60	54.8994	71.6006	51.8677		60	46.0869	69.565	45.86
70	38.0149	60.9274	43.8641		70	40.1165	59.7324	39.0898		70	49.0854	63.6385	45.6132		70	39.6181	62.7464	40.5768
80	32.7955	53.6657	39.6029		80	36.2464	52.2156	37.7781		80	43.9524	61.4195	44.0571		80	34.0414	55.0589	34.6559
90	31.1587	46.8181	36.0351		90	31.032	47.0529	32.2209		90	35.9832	51.5473	38.8028		90	29.5634	50.7552	31.929
120	31.8918	39.0244	29.0676		120	28.5525	37.4478	26.9662		120	31.7356	39.0565	30.0977		120	24.3826	37.869	24.6654

## Sheet: Fig 4D
Quantification of % S phase following 200mM CaCl2 addition, ssk1Δ
Replicate 1					Replicate 2					Replicate 3
minutes	SSK1	ssk1Δ			minutes	SSK1	ssk1Δ			minutes	SSK1	ssk1Δ
0	15.1	15.2			0	16.3	15.9			0	17.4	15.3
10	16.6	14.2			10	15.8	16.1			10	16.5	14.6
20	12.2	14.1			20	13.1	13.9			20	13.1	13.8
30	7.14	8.7			30	8.26	8.59			30	8.66	9.96
40	6.66	5.46			40	6.86	6.6			40	6.28	6.94
50	7.01	8.88			50	7.73	9.63			50	7.42	9.94
60	9.05	13			60	8.44	14.7			60	8.87	12.9
70	10.4	14.7			70	11.9	16.5			70	10.9	16.8
80	13.1	13.6			80	12.9	14.2			80	13.6	14.7
90	13.5	13.4			90	14	13.6			90	13.3	15.6

## Sheet: Fig 5A
Quantification of % S phase following 200mM CaCl2 addition, hog1Δ
Replicate 1					Replicate 2					Replicate 3
minutes	ET	FK506			minutes	ET	FK506			minutes	ET	FK506
0	8.22	9.12			0	10.2	9			0	8.75	8.32
10	8.32	8.27			10	8.9	8.03			10	7.51	8.03
20	8.03	7.73			20	8.29	7.7			20	6.32	7.62
30	7.86	7.57			30	7.66	8.57			30	6.42	7.41
45	6.82	7.6			45	6.27	9.65			45	5.09	8.79
60	6.28	9.54			60	8.89	10.5			60	5.99	8.44
90	6.7	11.6			90	9.24	9.8			90	6.86	8.56

## Sheet: Fig S1B
Quantification of % S phase following 200mM CaCl2 addition, CRZ1 (wild type)
Replicate 1					Replicate 2					Replicate 3
minutes	ET	FK506			minutes	ET	FK506			minutes	ET	FK506
0	13.6	13.8			0	12.7	12.9			0	15.1	15.5
10	9.53	10.1			10	10.3	10.9			10	12	13.2
20	6.55	5.85			20	7	7.61			20	8.93	9.53
30	2	1.61			30	2.57	2.74			30	3.51	3.62
45	1.57	2.62			45	4.04	5.91			45	2.61	4.89
60	11.6	13.2			60	10.4	15			60	11.9	15.1
90	13.6	15.8			90	11.4	13.1			90	13.5	16.2

## Sheet: Fig S1D
Quantification of cell cycle progression following release from a G1 arrest into media with or without 200mM CaCl2, CRZ1 (wild type)
Replicate 1					Replicate 2					Replicate 3
minutes	ET	ET + CaCl2	FK506 + CaCl2		minutes	ET	ET + CaCl2	FK506 + CaCl2		minutes	ET	ET + CaCl2	FK506 + CaCl2
0	0	0	0		0	0	0	0		0	0	0	0
15	3.52941	1.75439	5.55556		15	-1.25786	1.14286	6.62983		15	6.13497	1.85185	1.85185
30	18.2353	1.75439	7.22222		30	49.0566	4	15.4696		30	50.9202	5.55556	8.02469
40	73.5294	14.6199	34.4444		40	71.6981	19.4286	41.989		40	77.3006	21.6049	31.4815
50	85.8824	40.3509	60		50	79.2453	45.1429	64.0884		50	87.7301	53.0864	65.4321
60	88.8235	66.6667	73.8889		60	83.6478	61.7143	72.9282		60	88.9571	71.6049	77.1605
70	90.5882	75.4386	78.8889		70	86.1635	70.2857	83.4254		70	92.638	85.1852	90.1235
80	87.6471	83.6257	87.2222		80	84.9057	78.8571	85.0829		80	84.0491	90.1235	87.6543
90	69.4118	87.7193	88.3333		90	68.5535	77.7143	83.4254		90	65.0307	92.5926	90.7407

[truncated: 2 more sheets: Fig S4B, Fig S4D]
